# Supplementary material for: Computational Raman spectroscopy of organometallic reaction products in lithium and sodium-based battery systems
Source: Royal Society of Chemistry journal article supplement (doi:10.1039/c4cp03998j), 2014-01-01
Supplement: c4cp03998j1.pdf [file c4cp03998j1.pdf]

**Supplementary Information for**

**Computational Raman spectroscopy of organometallic reaction products in lithium and sodium-based battery systems**

**Roel S. Sánchez-Carrera and Boris Kozinsky\***

*Research and Technology Center North America  
Robert Bosch LLC  
Cambridge, Massachusetts 02142*

\*E-mail: [boris.kozinsky@us.bosch.com](mailto:boris.kozinsky@us.bosch.com)

Table S1. DFT/B3PW91/Sadlej optimized atomic coordinates (in Å) for  $\text{Li}_2\text{C}_2\text{O}_4$  and  $\text{Na}_2\text{C}_2\text{O}_4$  molecular dimers.

| Atom | X        | Y        | Z        | Atom | X        | Y        | Z        |
|------|----------|----------|----------|------|----------|----------|----------|
| C    | 0.02572  | 3.79329  | 3.33621  | C    | -0.33570 | 5.03110  | 1.46227  |
| C    | 0.20550  | -0.49235 | 0.55215  | C    | 0.36219  | -0.05950 | -0.56353 |
| C    | -1.22362 | 3.46338  | 4.23482  | C    | -1.78620 | 5.48124  | 0.98192  |
| C    | 1.45512  | -0.16310 | -0.34637 | C    | 1.81269  | -0.50764 | -0.08118 |
| LI   | -0.35914 | 5.70525  | 4.85447  | NA   | -0.72407 | 7.67663  | 2.51885  |
| LI   | 0.58999  | -2.40438 | -0.96538 | NA   | 0.75364  | -2.70892 | -1.61212 |
| LI   | -0.92533 | 1.38976  | 2.69746  | NA   | -1.48442 | 2.72710  | -0.15090 |
| LI   | 1.15696  | 1.91111  | 1.19052  | NA   | 1.51026  | 2.24693  | 1.04764  |
| O    | -0.12559 | 0.39663  | 1.38299  | O    | -0.01786 | 1.09189  | -0.21439 |
| O    | -0.35529 | -1.59648 | 0.37502  | O    | 0.04311  | 3.88007  | 1.11069  |
| O    | 0.35706  | 2.90460  | 2.50511  | O    | -0.31114 | -0.86323 | -1.25240 |
| O    | 0.58608  | 4.89761  | 3.51353  | O    | 0.33912  | 5.83270  | 2.15213  |
| O    | -1.54317 | 4.35712  | 5.06234  | O    | -2.16701 | 6.62655  | 1.34052  |
| O    | -1.77033 | 2.35817  | 4.04178  | O    | 2.19458  | -1.65347 | -0.43676 |
| O    | 1.77462  | -1.05721 | -1.17355 | O    | -2.42901 | 4.66412  | 0.28841  |
| O    | 2.00208  | 0.94203  | -0.15360 | O    | 2.45458  | 0.31144  | 0.61091  |

Table S2. DFT/B3PW91/Sadlej optimized atomic coordinates (in Å) for  $\text{HCO}_2\text{Li}$  and  $\text{HCO}_2\text{Na}$  molecular dimers.

| Atom | X       | Y       | Z       | Atom | X       | Y       | Z       |
|------|---------|---------|---------|------|---------|---------|---------|
| C    | 2.23030 | 5.56204 | 1.37037 | C    | 3.78710 | 5.49212 | 4.46497 |
| C    | 5.76309 | 8.47929 | 1.35473 | C    | 7.71389 | 8.81080 | 3.71166 |
| H    | 1.40492 | 4.81849 | 1.36646 | H    | 2.72645 | 5.33239 | 4.76394 |
| H    | 6.58844 | 9.22289 | 1.35850 | H    | 8.77442 | 8.97060 | 3.41225 |
| LI   | 2.95868 | 8.21959 | 1.57511 | NA   | 5.18333 | 8.60761 | 4.44913 |
| LI   | 5.03467 | 5.82175 | 1.15020 | NA   | 6.31786 | 5.69529 | 3.72820 |
| O    | 1.90560 | 6.76602 | 1.52039 | O    | 4.21673 | 6.68584 | 4.49208 |
| O    | 3.39521 | 5.11365 | 1.22426 | O    | 4.45807 | 4.49322 | 4.13164 |
| O    | 4.59817 | 8.92765 | 1.50094 | O    | 7.04288 | 9.80969 | 4.04493 |
| O    | 6.08782 | 7.27531 | 1.20475 | O    | 7.28445 | 7.61702 | 3.68504 |

Table S3. DFT/B3PW91/Sadlej optimized atomic coordinates (in Å) for CH<sub>3</sub>CO<sub>2</sub>Li and CH<sub>3</sub>CO<sub>2</sub>Na molecular dimers.

| Atom | X        | Y        | Z        | Atom | X       | Y        | Z       |
|------|----------|----------|----------|------|---------|----------|---------|
| C    | -2.33080 | 0.25480  | -0.04289 | C    | 5.73244 | 7.84716  | 5.63654 |
| C    | 2.33725  | -0.24308 | 0.04678  | C    | 5.74354 | 13.60762 | 2.46909 |
| C    | -3.74841 | -0.25461 | -0.07101 | C    | 5.98095 | 6.36019  | 5.77916 |
| C    | 3.75490  | 0.26624  | 0.07510  | C    | 5.99209 | 12.12071 | 2.61212 |
| H    | -3.89132 | -0.89586 | -0.95251 | H    | 4.68734 | 13.83091 | 2.67865 |
| H    | 3.89790  | 0.90697  | 0.95698  | H    | 5.38377 | 5.81641  | 5.03204 |
| H    | -3.92839 | -0.88289 | 0.81330  | H    | 5.71942 | 6.00750  | 6.78219 |
| H    | 3.93490  | 0.89501  | -0.80886 | H    | 6.00594 | 13.96027 | 1.46627 |
| H    | -4.46376 | 0.57320  | -0.09072 | H    | 6.33984 | 14.15160 | 3.21676 |
| H    | 4.47018  | -0.56163 | 0.09436  | H    | 7.03688 | 6.13668  | 5.56854 |
| Li   | -0.25911 | 1.28762  | 0.00982  | NA   | 5.24366 | 10.44181 | 5.49614 |
| Li   | 0.26552  | -1.27609 | -0.00603 | NA   | 6.48092 | 9.52614  | 2.75262 |
| O    | -1.38463 | -0.60303 | -0.03346 | O    | 5.22955 | 8.48374  | 6.59299 |
| O    | 1.39112  | 0.61477  | 0.03735  | O    | 5.67533 | 11.57720 | 3.72301 |
| O    | -2.10907 | 1.49162  | -0.02781 | O    | 6.04916 | 8.39090  | 4.52573 |
| O    | 2.11547  | -1.47989 | 0.03159  | O    | 6.49501 | 11.48395 | 1.65579 |

Table S4. DFT/B3PW91/Sadlej optimized atomic coordinates (in Å) for CH<sub>3</sub>OCO<sub>2</sub>Li and CH<sub>3</sub>OCO<sub>2</sub>Na molecular dimers.

| Atom | X        | Y        | Z        | Atom | X       | Y      | Z      |
|------|----------|----------|----------|------|---------|--------|--------|
| C    | 2.22698  | -0.68353 | -0.05408 | C    | 10.9970 | 3.9241 | 7.3136 |
| C    | -2.23700 | 0.68761  | 0.05174  | C    | 12.8625 | 2.6977 | 8.0552 |
| C    | 4.42101  | -1.50939 | -0.10505 | C    | 5.1496  | 7.9921 | 4.9451 |
| C    | -4.43056 | 1.51475  | 0.10273  | C    | 7.0157  | 6.7655 | 5.6848 |
| H    | 4.24145  | -2.14962 | -0.97915 | H    | 12.3564 | 2.3218 | 8.9556 |
| H    | -4.25056 | 2.15497  | 0.97677  | H    | 12.7764 | 1.9357 | 7.2675 |
| H    | 4.30082  | -2.11436 | 0.80372  | H    | 13.9193 | 2.8901 | 8.2740 |
| H    | -4.31000 | 2.11957  | -0.80611 | H    | 4.0925  | 7.7998 | 4.7273 |
| H    | 5.43171  | -1.08953 | -0.14686 | H    | 5.2365  | 8.7538 | 5.7329 |
| H    | -5.44152 | 1.09552  | 0.14461  | H    | 5.6547  | 8.3684 | 4.0443 |
| Li   | 0.03331  | -1.27843 | 0.01663  | NA   | 8.4521  | 3.8550 | 6.7006 |
| Li   | -0.04324 | 1.28235  | -0.01903 | NA   | 9.5606  | 6.8341 | 6.2968 |
| O    | 1.45006  | 0.31857  | -0.04667 | O    | 10.3471 | 2.8574 | 7.3974 |
| O    | -1.46065 | -0.31493 | 0.04436  | O    | 10.5330 | 5.0407 | 6.9440 |
| O    | 1.82870  | -1.87231 | -0.02409 | O    | 12.3144 | 3.9393 | 7.6350 |
| O    | -1.83817 | 1.87623  | 0.02164  | O    | 5.6981  | 6.7503 | 5.3643 |
| O    | 3.53500  | -0.39348 | -0.09734 | O    | 7.4799  | 5.6487 | 6.0537 |
| O    | -3.54522 | 0.39831  | 0.09508  | O    | 7.6655  | 7.8322 | 5.6011 |

Table S5. DFT/B3PW91/Sadlej optimized atomic coordinates (in Å) for CH<sub>3</sub>OLi and CH<sub>3</sub>ONa molecular dimers.

| Atom | X        | Y        | Z        | Atom | X        | Y        | Z        |
|------|----------|----------|----------|------|----------|----------|----------|
| C    | -2.69096 | -0.57842 | 0.00037  | C    | -2.92230 | -0.54435 | -0.03511 |
| C    | 2.69099  | 0.57846  | -0.00039 | C    | 2.92439  | 0.54496  | 0.03572  |
| H    | 3.00485  | 1.16989  | -0.88746 | H    | -3.20941 | -1.39482 | -0.69872 |
| H    | -3.00504 | -1.16917 | 0.88780  | H    | 3.21188  | 1.39148  | 0.70420  |
| H    | 3.00519  | 1.16965  | 0.88670  | H    | -3.33909 | -0.80009 | 0.96846  |
| H    | -3.00522 | -1.17016 | -0.88634 | H    | 3.34008  | 0.80694  | -0.96670 |
| H    | -3.33118 | 0.32889  | -0.00008 | H    | -3.53283 | 0.31884  | -0.39135 |
| H    | 3.33138  | -0.32874 | -0.00064 | H    | 3.53560  | -0.32017 | 0.38606  |
| LI   | -0.23622 | 1.09314  | 0.00074  | NA   | -0.25128 | 1.35948  | -0.27483 |
| LI   | 0.23625  | -1.09335 | -0.00085 | NA   | 0.25340  | -1.35913 | 0.27546  |
| O    | -1.34115 | -0.28694 | 0.00007  | O    | -1.56980 | -0.29300 | -0.01877 |
| O    | 1.34122  | 0.28672  | -0.00018 | O    | 1.57195  | 0.29328  | 0.01924  |

Table S6. DFT/PBE0/TZVPPD optimized atomic coordinates (in Å) for Li<sub>2</sub>C<sub>2</sub>O<sub>4</sub> and Na<sub>2</sub>C<sub>2</sub>O<sub>4</sub> molecular dimers.

| Atom | X        | Y        | Z        | Atom | X        | Y        | Z        |
|------|----------|----------|----------|------|----------|----------|----------|
| C    | -0.07039 | 3.74129  | 3.43271  | C    | -0.32365 | 5.02353  | 1.44679  |
| C    | 0.30656  | -0.40609 | 0.53411  | C    | 0.35511  | -0.05151 | -0.54693 |
| C    | -1.30147 | 3.34239  | 4.32944  | C    | -1.77023 | 5.47570  | 0.96471  |
| C    | 1.53782  | -0.00712 | -0.36244 | C    | 1.80171  | -0.50368 | -0.06492 |
| LI   | -0.50042 | 5.58810  | 4.99927  | NA   | -0.70111 | 7.66622  | 2.48796  |
| LI   | 0.73720  | -2.25299 | -1.03212 | NA   | 0.73257  | -2.69411 | -1.58828 |
| LI   | -0.92237 | 1.34615  | 2.74072  | NA   | -1.48263 | 2.72365  | -0.15111 |
| LI   | 1.15815  | 1.98912  | 1.22600  | NA   | 1.51408  | 2.24831  | 1.05104  |
| O    | -0.04935 | 0.44049  | 1.38978  | O    | -0.01352 | 1.09811  | -0.20306 |
| O    | -0.21453 | -1.51722 | 0.32994  | O    | 0.04497  | 3.87387  | 1.10303  |
| O    | 0.28524  | 2.89476  | 2.57690  | O    | -0.32128 | -0.84869 | -1.22709 |
| O    | 0.45088  | 4.85233  | 3.63690  | O    | 0.35273  | 5.82075  | 2.12692  |
| O    | -1.63654 | 4.19466  | 5.18393  | O    | -2.14518 | 6.61684  | 1.31739  |
| O    | -1.81514 | 2.23442  | 4.10592  | O    | 2.17667  | -1.64480 | -0.41766 |
| O    | 1.87319  | -0.85944 | -1.21676 | O    | -2.40973 | 4.66144  | 0.27776  |
| O    | 2.05134  | 1.10092  | -0.13891 | O    | 2.44122  | 0.31056  | 0.62204  |

Table S7. DFT/PBE0/TZVPPD optimized atomic coordinates (in Å) for HCO<sub>2</sub>Li and HCO<sub>2</sub>Na molecular dimers.

| Atom | X       | Y       | Z       | Atom | X       | Y       | Z       |
|------|---------|---------|---------|------|---------|---------|---------|
| C    | 2.21120 | 5.59969 | 1.38428 | C    | 3.76395 | 5.50951 | 4.35248 |
| C    | 5.78162 | 8.44322 | 1.34136 | C    | 7.73710 | 8.79369 | 3.82428 |
| H    | 1.37970 | 4.87283 | 1.38371 | H    | 2.68337 | 5.36682 | 4.54584 |
| H    | 6.61313 | 9.17007 | 1.34197 | H    | 8.81768 | 8.93638 | 3.63089 |
| LI   | 2.97741 | 8.24126 | 1.59990 | NA   | 5.15849 | 8.61947 | 4.29884 |
| LI   | 5.01543 | 5.80163 | 1.12570 | NA   | 6.34256 | 5.68372 | 3.87802 |
| O    | 1.90714 | 6.80059 | 1.54564 | O    | 4.18846 | 6.69953 | 4.35550 |
| O    | 3.36116 | 5.13615 | 1.22332 | O    | 4.45788 | 4.50056 | 4.15168 |
| O    | 4.63167 | 8.90677 | 1.50232 | O    | 7.04315 | 9.80264 | 4.02502 |
| O    | 6.08567 | 7.24232 | 1.17997 | O    | 7.31260 | 7.60366 | 3.82136 |

Table S8. DFT/PBE0/TZVPPD optimized atomic coordinates (in Å) for CH<sub>3</sub>CO<sub>2</sub>Li and CH<sub>3</sub>CO<sub>2</sub>Na molecular dimers.

| Atom | X        | Y        | Z        | Atom | X       | Y        | Z       |
|------|----------|----------|----------|------|---------|----------|---------|
| C    | -2.33899 | 0.20913  | -0.07161 | C    | 5.64091 | 7.86586  | 5.63523 |
| C    | 2.33925  | -0.20583 | 0.07279  | C    | 5.86268 | 6.38069  | 5.79766 |
| C    | -3.74211 | -0.32741 | -0.11695 | C    | 6.07958 | 12.09867 | 2.61072 |
| C    | 3.74248  | 0.33048  | 0.11751  | C    | 5.85796 | 13.58386 | 2.44838 |
| H    | 3.84347  | 1.02809  | 0.94985  | H    | 6.91331 | 6.14347  | 5.62267 |
| H    | -3.84591 | -1.01321 | -0.95881 | H    | 5.56559 | 6.04657  | 6.78884 |
| H    | -3.93321 | -0.90354 | 0.79053  | H    | 5.28331 | 5.84546  | 5.04255 |
| H    | 3.93774  | 0.89332  | -0.79749 | H    | 6.15561 | 13.91813 | 1.45743 |
| H    | 4.46525  | -0.47594 | 0.21119  | H    | 6.43687 | 14.11897 | 3.20392 |
| H    | -4.46578 | 0.47962  | -0.19724 | H    | 4.80722 | 13.82107 | 2.62278 |
| Li   | -0.27955 | 1.27933  | 0.01810  | NA   | 5.18631 | 10.45189 | 5.46416 |
| Li   | 0.27982  | -1.27604 | -0.01759 | NA   | 6.53390 | 9.51259  | 2.78166 |
| O    | -1.38228 | -0.62851 | -0.06012 | O    | 6.01206 | 8.39421  | 4.54038 |
| O    | 1.38262  | 0.63187  | 0.06051  | O    | 5.10718 | 8.50985  | 6.56003 |
| O    | -2.14007 | 1.44164  | -0.04020 | O    | 6.61347 | 11.45472 | 1.68598 |
| O    | 2.14026  | -1.43835 | 0.04169  | O    | 5.70811 | 11.57024 | 3.70544 |

Table S9. DFT/PBE0/TZVPPD optimized atomic coordinates (in Å) for CH<sub>3</sub>OCO<sub>2</sub>Li and CH<sub>3</sub>OCO<sub>2</sub>Na molecular dimers.

| Atom | X        | Y        | Z        | Atom | X        | Y       | Z       |
|------|----------|----------|----------|------|----------|---------|---------|
| C    | 2.21515  | -0.71963 | 0.00001  | C    | 11.01804 | 3.93032 | 7.30507 |
| C    | -2.21521 | 0.71953  | -0.00002 | C    | 12.90458 | 2.73873 | 8.03471 |
| C    | 4.39298  | -1.57899 | 0.00007  | C    | 5.12715  | 7.92874 | 4.97676 |
| C    | -4.39304 | 1.57893  | 0.00001  | C    | 7.01380  | 6.73701 | 5.70586 |
| H    | 4.23496  | -2.19271 | 0.88716  | H    | 12.40626 | 2.34306 | 8.92076 |
| H    | 4.23496  | -2.19284 | -0.88692 | H    | 12.84270 | 1.99454 | 7.23943 |
| H    | -4.23499 | 2.19276  | 0.88701  | H    | 13.94688 | 2.95799 | 8.25960 |
| H    | -4.23505 | 2.19266  | -0.88707 | H    | 4.08481  | 7.70953 | 4.75200 |
| H    | 5.40171  | -1.17194 | 0.00004  | H    | 5.18915  | 8.67276 | 5.77219 |
| H    | -5.40177 | 1.17188  | 0.00006  | H    | 5.62532  | 8.32461 | 4.09072 |
| Li   | 0.01172  | -1.29746 | 0.00006  | NA   | 8.49000  | 3.83788 | 6.68313 |
| Li   | -0.01176 | 1.29737  | -0.00012 | NA   | 9.54190  | 6.82938 | 6.32754 |
| O    | 1.46053  | 0.29224  | -0.00007 | O    | 10.39318 | 2.85572 | 7.37236 |
| O    | -1.46061 | -0.29237 | 0.00002  | O    | 10.53366 | 5.03723 | 6.94935 |
| O    | 1.80051  | -1.89628 | 0.00010  | O    | 12.32700 | 3.96818 | 7.62985 |
| O    | -1.80054 | 1.89617  | -0.00009 | O    | 5.70479  | 6.69920 | 5.38126 |
| O    | 3.52349  | -0.45489 | -0.00002 | O    | 7.49824  | 5.63002 | 6.06125 |
| O    | -3.52355 | 0.45482  | 0.00004  | O    | 7.63863  | 7.81164 | 5.63873 |

Table S10. DFT/PBE0/TZVPPD optimized atomic coordinates (in Å) for CH<sub>3</sub>OLi and CH<sub>3</sub>ONa molecular dimers.

| Atom | X        | Y        | Z        | Atom | X        | Y        | Z        |
|------|----------|----------|----------|------|----------|----------|----------|
| C    | 2.68889  | 0.59921  | -0.05115 | C    | -2.89805 | -0.63556 | -0.12715 |
| C    | -2.68896 | -0.59913 | 0.05134  | C    | 2.89878  | 0.62919  | 0.13780  |
| H    | 2.92714  | 1.44082  | -0.72244 | H    | 3.11127  | 1.58954  | 0.64620  |
| H    | -2.92720 | -1.44064 | 0.72275  | H    | -3.12281 | -1.50219 | -0.77846 |
| H    | 3.07461  | 0.87750  | 0.94376  | H    | -3.34269 | -0.88006 | 0.85638  |
| H    | -3.07469 | -0.87758 | -0.94353 | H    | 3.37876  | 0.70897  | -0.85623 |
| H    | 3.30671  | -0.24682 | -0.39497 | H    | 3.48452  | -0.12845 | 0.69312  |
| H    | -3.30680 | 0.24695  | 0.39503  | H    | -3.50718 | 0.19581  | -0.53137 |
| LI   | 0.24467  | -1.08682 | 0.03008  | NA   | -0.30494 | 1.34605  | 0.29440  |
| LI   | -0.24476 | 1.08692  | -0.02994 | NA   | 0.30575  | -1.35397 | -0.28126 |
| O    | 1.34224  | 0.30096  | -0.03120 | O    | -1.55707 | -0.34238 | -0.05620 |
| O    | -1.34232 | -0.30085 | 0.03134  | O    | 1.55791  | 0.33509  | 0.06867  |

Table S11. DFT/PBE0/TZVPPD vibrational frequencies for dimers of  $\text{Li}_2\text{C}_2\text{O}_4$  and  $\text{Na}_2\text{C}_2\text{O}_4$  and their respective band assignments. The reported vibrational frequencies were scaled by 0.9594 (see text for details).

| $\text{Li}_2\text{C}_2\text{O}_4$ |                               |                                                   | $\text{Na}_2\text{C}_2\text{O}_4$ |                               |                                                   |
|-----------------------------------|-------------------------------|---------------------------------------------------|-----------------------------------|-------------------------------|---------------------------------------------------|
| ( $\text{cm}^{-1}$ )              | ( $\text{\AA}^4/\text{amu}$ ) | Assignment                                        | ( $\text{cm}^{-1}$ )              | ( $\text{\AA}^4/\text{amu}$ ) | Assignment                                        |
| 1694                              | 0                             | $\nu(\text{C}=\text{O})$                          | 1663                              | 2                             | $\nu(\text{C}=\text{O})$                          |
| 1678                              | 0                             | $\nu(\text{C}=\text{O})$                          | 1655                              | 0                             | $\nu(\text{C}=\text{O})$                          |
| 1647                              | 23                            | $\nu(\text{C}=\text{O})$                          | 1624                              | 22                            | $\nu(\text{C}=\text{O})$                          |
| 1635                              | 0                             | $\nu(\text{C}=\text{O})$                          | 1610                              | 0                             | $\nu(\text{C}=\text{O})$                          |
| 1428                              | 62                            | $\nu(\text{C}-\text{C}) + \nu(\text{C}-\text{O})$ | 1411                              | 83                            | $\nu(\text{C}-\text{C}) + \nu(\text{C}-\text{O})$ |
| 1427                              | 0                             | $\nu(\text{C}-\text{C}) + \nu(\text{C}-\text{O})$ | 1411                              | 0                             | $\nu(\text{C}-\text{C}) + \nu(\text{C}-\text{O})$ |
| 1321                              | 1                             | $\nu(\text{OCO})$                                 | 1315                              | 1                             | $\nu(\text{OCO})$                                 |
| 1319                              | 0                             | $\nu(\text{OCO})$                                 | 1313                              | 0                             | $\nu(\text{OCO})$                                 |
| 877                               | 0                             | $\delta(\text{OCO}) + \nu(\text{C}-\text{C})$     | 855                               | 1                             | $\delta(\text{OCO}) + \nu(\text{C}-\text{C})$     |
| 871                               | 15                            | $\delta(\text{OCO}) + \nu(\text{C}-\text{C})$     | 855                               | 17                            | $\delta(\text{OCO}) + \nu(\text{C}-\text{C})$     |
| 851                               | 0                             | $\delta(\text{OCO})$ out of plane                 | 850                               | 0                             | $\delta(\text{OCO})$ out of plane                 |
| 850                               | 0                             | $\delta(\text{COC})$ out of plane                 | 850                               | 0                             | $\delta(\text{OCO})$ out of plane                 |
| 803                               | 0                             | $\delta(\text{OCO})$                              | 764                               | 0                             | $\delta(\text{OCO})$                              |
| 787                               | 0                             | $\delta(\text{OCO})$                              | 763                               | 0                             | $\delta(\text{OCO})$                              |
| 651                               | 0                             | $\nu(\text{O}-\text{Li})$                         | 555                               | 4                             | $\delta(\text{OCO})$                              |
| 622                               | 2                             | $\nu(\text{O}-\text{Li})$                         | 554                               | 0                             | $\delta(\text{OCO})$                              |
| 592                               | 11                            | $\delta(\text{OCO}) + \delta(\text{O}-\text{Li})$ | 495                               | 0                             | $\delta(\text{OCO})$ out of plane                 |
| 590                               | 0                             | $\delta(\text{OCO}) + \delta(\text{O}-\text{Li})$ | 493                               | 0                             | $\delta(\text{OCO})$ out of plane                 |
| 577                               | 5                             | $\delta(\text{OCO}) + \nu(\text{O}-\text{Li})$    | 470                               | 16                            | $\nu(\text{C}-\text{C})$                          |
| 554                               | 0                             | $\delta(\text{OCO}) + \nu(\text{O}-\text{Li})$    | 467                               | 0                             | $\nu(\text{C}-\text{C})$                          |
| 516                               | 2                             | $\delta(\text{OCO}) + \delta(\text{O}-\text{Li})$ |                                   |                               |                                                   |
| 516                               | 0                             | $\delta(\text{OCO}) + \delta(\text{O}-\text{Li})$ |                                   |                               |                                                   |
| 490                               | 0                             | $\delta(\text{OCO})$ out of plane                 |                                   |                               |                                                   |
| 487                               | 0                             | $\delta(\text{OCO})$ out of plane                 |                                   |                               |                                                   |
| 449                               | 0                             | $\nu(\text{C}-\text{C})$                          |                                   |                               |                                                   |
| 433                               | 5                             | $\nu(\text{C}-\text{C})$                          |                                   |                               |                                                   |



Table S12. DFT/PBE0/TZVPPD vibrational frequencies for dimers of HCO<sub>2</sub>Li and HCO<sub>2</sub>Na and their respective band assignments. The reported vibrational frequencies were scaled by 0.9594 (see text for details).

| HCO <sub>2</sub> Li |                       |                  | HCO <sub>2</sub> Na |                       |            |
|---------------------|-----------------------|------------------|---------------------|-----------------------|------------|
| (cm <sup>-1</sup> ) | (Å <sup>4</sup> /amu) | Assignment       | (cm <sup>-1</sup> ) | (Å <sup>4</sup> /amu) | Assignment |
| 2868                | 324                   | v(CH)            | 2836                | 386                   | v(CH)      |
| 2866                | 0                     | v(CH)            | 2835                | 0                     | v(CH)      |
| 1643                | 0                     | v(C=O)           | 1609                | 0                     | v(C=O)     |
| 1601                | 1                     | v(C=O)           | 1608                | 4                     | v(C=O)     |
| 1377                | 27                    | v(OCO)           | 1360                | 28                    | v(OCO)     |
| 1376                | 0                     | v(OCO)           | 1356                | 0                     | v(OCO)     |
| 1346                | 0                     | δ(HCO)           | 1321                | 11                    | δ(HCO)     |
| 1346                | 10                    | δ(HCO)           | 1320                | 0                     | δ(HCO)     |
| 1046                | 0                     | τ(CH)            | 1038                | 0                     | τ(CH)      |
| 1046                | 1                     | τ(CH)            | 1038                | 1                     | τ(CH)      |
| 742                 | 0                     | δ(OCO) + v(O-Li) | 760                 | 0                     | δ(OCO)     |
| 740                 | 1                     | δ(OCO)           | 759                 | 2                     | δ(OCO)     |
| 690                 | 0                     | v(O-Li)          |                     |                       |            |
| 673                 | 0                     | v(O-Li)          |                     |                       |            |

Table S13. DFT/PBE0/TZVPPD vibrational frequencies for dimers of CH<sub>3</sub>CO<sub>2</sub>Li and CH<sub>3</sub>CO<sub>2</sub>Na and their respective band assignments. The reported vibrational frequencies were scaled by 0.9594 (see text for details).

| CH <sub>3</sub> CO <sub>2</sub> Li |                       |                              | CH <sub>3</sub> CO <sub>2</sub> Na |                       |                              |
|------------------------------------|-----------------------|------------------------------|------------------------------------|-----------------------|------------------------------|
| (cm <sup>-1</sup> )                | (Å <sup>4</sup> /amu) | Assignment                   | (cm <sup>-1</sup> )                | (Å <sup>4</sup> /amu) | Assignment                   |
| 3051                               | 71                    | ν(HCH <sub>2</sub> )         | 3044                               | 104                   | ν(HCH <sub>2</sub> )         |
| 3051                               | 31                    | ν(HCH <sub>2</sub> )         | 3044                               | 6                     | ν(HCH <sub>2</sub> )         |
| 3011                               | 41                    | ν(HCH <sub>2</sub> )         | 3006                               | 31                    | ν(HCH <sub>2</sub> )         |
| 3011                               | 52                    | ν(HCH <sub>2</sub> )         | 3006                               | 62                    | ν(HCH <sub>2</sub> )         |
| 2944                               | 175                   | ν(CH <sub>3</sub> )          | 2939                               | 306                   | ν(CH <sub>3</sub> )          |
| 2944                               | 169                   | ν(CH <sub>3</sub> )          | 2939                               | 30                    | ν(CH <sub>3</sub> )          |
| 1589                               | 0                     | ν(C=O)                       | 1587                               | 0                     | ν(C=O)                       |
| 1578                               | 8                     | ν(C=O)                       | 1584                               | 11                    | ν(C=O)                       |
| 1445                               | 15                    | ν(C-O) + δ(CH <sub>3</sub> ) | 1420                               | 19                    | ν(C-O) + δ(CH <sub>3</sub> ) |
| 1433                               | 0                     | ν(C-O) + δ(CH <sub>3</sub> ) | 1416                               | 0                     | δ(HCH <sub>2</sub> )         |
| 1411                               | 6                     | δ(HCH <sub>2</sub> )         | 1414                               | 8                     | δ(HCH <sub>2</sub> )         |
| 1411                               | 0                     | δ(HCH <sub>2</sub> )         | 1410                               | 0                     | ν(C-O) + δ(CH <sub>3</sub> ) |
| 1394                               | 1                     | δ(HCH <sub>2</sub> )         | 1395                               | 14                    | δ(HCH <sub>2</sub> )         |
| 1394                               | 13                    | δ(HCH <sub>2</sub> )         | 1395                               | 0                     | δ(HCH <sub>2</sub> )         |
| 1313                               | 1                     | δ(CH <sub>3</sub> ) + ν(C-O) | 1308                               | 2                     | δ(CH <sub>3</sub> ) + ν(C-O) |
| 1312                               | 0                     | δ(CH <sub>3</sub> ) + ν(C-O) | 1307                               | 0                     | δ(CH <sub>3</sub> ) + ν(C-O) |
| 1026                               | 0                     | τ(CH <sub>3</sub> CO)        | 1023                               | 0                     | τ(CH <sub>3</sub> CO)        |
| 1026                               | 0                     | τ(CH <sub>3</sub> CO)        | 1023                               | 0                     | τ(CH <sub>3</sub> CO)        |
| 995                                | 0                     | τ(CH <sub>3</sub> CO)        | 985                                | 0                     | τ(CH <sub>3</sub> CO)        |
| 989                                | 4                     | τ(CH <sub>3</sub> CO)        | 984                                | 3                     | τ(CH <sub>3</sub> CO)        |
| 947                                | 0                     | ν(C-C) + δ(OCO)              | 921                                | 0                     | ν(C-C) + δ(OCO)              |
| 932                                | 21                    | ν(C-C) + δ(OCO)              | 920                                | 27                    | ν(C-C) + δ(OCO)              |
| 697                                | 0                     | ν(O-Li)                      | 645                                | 2                     | δ(OCO) + ν(C-C)              |
| 697                                | 0                     | ν(O-Li)                      | 645                                | 0                     | δ(OCO) + ν(C-C)              |
| 649                                | 0                     | δ(OCO) + ν(C-C)              | 600                                | 0                     | δ(CCO) out of plane          |
| 646                                | 3                     | δ(OCO) + ν(C-C)              | 600                                | 2                     | δ(CCO) out of plane          |
| 603                                | 0                     | δ(CCO) out of plane          | 452                                | 0                     | δ(CCO) in plane              |
| 601                                | 2                     | δ(CCO) out of plane          | 443                                | 0                     | δ(CCO) in plane              |
| 450                                | 0                     | δ(CCO) in plane              |                                    |                       |                              |
| 441                                | 0                     | δ(OCO) in plane              |                                    |                       |                              |

Table S14. DFT/PBE0/TZVPPD vibrational frequencies for dimers of CH<sub>3</sub>OCO<sub>2</sub>Li and CH<sub>3</sub>OCO<sub>2</sub>Na and their respective band assignments. The reported vibrational frequencies were scaled by 0.9594 (see text for details).

| CH <sub>3</sub> OCO <sub>2</sub> Li |                       |                                  | CH <sub>3</sub> OCO <sub>2</sub> Na |                       |                                  |
|-------------------------------------|-----------------------|----------------------------------|-------------------------------------|-----------------------|----------------------------------|
| (cm <sup>-1</sup> )                 | (Å <sup>4</sup> /amu) | Assignment                       | (cm <sup>-1</sup> )                 | (Å <sup>4</sup> /amu) | Assignment                       |
| 3041                                | 92                    | v(HCH <sub>2</sub> )             | 3030                                | 98                    | v(HCH <sub>2</sub> )             |
| 3041                                | 41                    | v(HCH <sub>2</sub> )             | 3030                                | 42                    | v(HCH <sub>2</sub> )             |
| 3015                                | 3                     | v(HCH <sub>2</sub> )             | 3004                                | 0                     | v(HCH <sub>2</sub> )             |
| 3015                                | 74                    | v(HCH <sub>2</sub> )             | 3004                                | 84                    | v(HCH <sub>2</sub> )             |
| 2940                                | 334                   | v(CH <sub>3</sub> )              | 2933                                | 346                   | v(CH <sub>3</sub> )              |
| 2940                                | 4                     | v(CH <sub>3</sub> )              | 2933                                | 1                     | v(CH <sub>3</sub> )              |
| 1622                                | 0                     | v(C=O)                           | 1628                                | 6                     | v(C=O)                           |
| 1615                                | 4                     | v(C=O)                           | 1627                                | 0                     | v(C=O)                           |
| 1463                                | 9                     | v(C-O) + δ(CH <sub>3</sub> )     | 1440                                | 10                    | v(C-O) + δ(CH <sub>3</sub> )     |
| 1452                                | 0                     | v(C-O) + δ(CH <sub>3</sub> )     | 1438                                | 0                     | v(C-O) + δ(CH <sub>3</sub> )     |
| 1434                                | 6                     | δ(HCH <sub>2</sub> )             | 1434                                | 5                     | δ(HCH <sub>2</sub> )             |
| 1433                                | 0                     | δ(HCH <sub>2</sub> )             | 1431                                | 0                     | δ(HCH <sub>2</sub> )             |
| 1421                                | 1                     | δ(HCH <sub>2</sub> )             | 1418                                | 1                     | δ(HCH <sub>2</sub> )             |
| 1421                                | 7                     | δ(HCH <sub>2</sub> )             | 1418                                | 7                     | δ(HCH <sub>2</sub> )             |
| 1369                                | 4                     | v(C-O) + δ(CH <sub>3</sub> )     | 1348                                | 8                     | v(C-O) + δ(CH <sub>3</sub> )     |
| 1357                                | 0                     | v(C-O) + δ(CH <sub>3</sub> )     | 1337                                | 0                     | v(C-O) + δ(CH <sub>3</sub> )     |
| 1174                                | 0                     | τ(HCOC)                          | 1168                                | 3                     | τ(HCOC)                          |
| 1174                                | 4                     | τ(HCOC)                          | 1167                                | 0                     | τ(HCOC)                          |
| 1133                                | 0                     | τ(HCOC)                          | 1132                                | 4                     | τ(HCOC)                          |
| 1133                                | 5                     | τ(HCOC)                          | 1132                                | 0                     | τ(HCOC)                          |
| 1119                                | 0                     | v(C-O)                           | 1110                                | 1                     | v(C-O)                           |
| 1116                                | 1                     | v(C-O)                           | 1109                                | 0                     | v(C-O)                           |
| 958                                 | 0                     | v(C-O)                           | 936                                 | 0                     | v(C-O)                           |
| 947                                 | 29                    | v(C-O)                           | 935                                 | 30                    | v(C-O)                           |
| 811                                 | 0                     | δ(CO <sub>3</sub> ) out of plane | 812                                 | 0                     | δ(CO <sub>3</sub> ) out of plane |
| 810                                 | 0                     | δ(CO <sub>3</sub> ) out of plane | 811                                 | 0                     | δ(CO <sub>3</sub> ) out of plane |
| 733                                 | 1                     | δ(O-C=O) + v(O-Li)               | 695                                 | 1                     | δ(O-C=O)                         |
| 722                                 | 0                     | δ(O-C=O) + v(O-Li)               | 695                                 | 0                     | δ(O-C=O)                         |
| 681                                 | 0                     | δ(COO) + v(O-Li)                 | 587                                 | 4                     | δ(O-C-O)                         |
| 638                                 | 1                     | δ(COO) + v(O-Li)                 | 584                                 | 0                     | δ(O-C-O)                         |
| 580                                 | 4                     | δ(O-C-O)                         |                                     |                       |                                  |
| 561                                 | 0                     | δ(O-C-O)                         |                                     |                       |                                  |

Table S15. DFT/PBE0/TZVPPD vibrational frequencies for dimers of CH<sub>3</sub>OLi and CH<sub>3</sub>ONa and their respective band assignments. The reported vibrational frequencies were scaled by 0.9594 (see text for details).

| CH <sub>3</sub> OLi |                       |                      | CH <sub>3</sub> ONa |                       |                      |
|---------------------|-----------------------|----------------------|---------------------|-----------------------|----------------------|
| (cm <sup>-1</sup> ) | (Å <sup>4</sup> /amu) | Assignment           | (cm <sup>-1</sup> ) | (Å <sup>4</sup> /amu) | Assignment           |
| 2847                | 0                     | ν(HCH <sub>2</sub> ) | 2790                | 80                    | ν(HCH <sub>2</sub> ) |
| 2847                | 215                   | ν(HCH <sub>2</sub> ) | 2790                | 241                   | ν(HCH <sub>2</sub> ) |
| 2845                | 0                     | ν(HCH <sub>2</sub> ) | 2787                | 19                    | ν(HCH <sub>2</sub> ) |
| 2845                | 239                   | ν(HCH <sub>2</sub> ) | 2786                | 303                   | ν(HCH <sub>2</sub> ) |
| 2815                | 453                   | ν(CH) <sub>3</sub>   | 2772                | 428                   | ν(CH) <sub>3</sub>   |
| 2811                | 0                     | ν(CH) <sub>3</sub>   | 2768                | 0                     | ν(CH) <sub>3</sub>   |
| 1437                | 11                    | δ(HCH <sub>2</sub> ) | 1430                | 12                    | δ(HCH <sub>2</sub> ) |
| 1436                | 0                     | δ(HCH <sub>2</sub> ) | 1429                | 1                     | δ(HCH <sub>2</sub> ) |
| 1434                | 16                    | δ(HCH <sub>2</sub> ) | 1428                | 7                     | δ(HCH <sub>2</sub> ) |
| 1434                | 0                     | δ(HCH <sub>2</sub> ) | 1427                | 9                     | δ(HCH <sub>2</sub> ) |
| 1428                | 10                    | δ(HCH <sub>2</sub> ) | 1423                | 9                     | δ(HCH <sub>2</sub> ) |
| 1425                | 0                     | δ(HCH <sub>2</sub> ) | 1420                | 0                     | δ(HCH <sub>2</sub> ) |
| 1160                | 1                     | ν(C-O)               | 1142                | 0                     | τ(OCH <sub>3</sub> ) |
| 1151                | 3                     | τ(OCH <sub>3</sub> ) | 1141                | 0                     | τ(OCH <sub>3</sub> ) |
| 1151                | 0                     | τ(OCH <sub>3</sub> ) | 1136                | 0                     | ν(C-O)               |
| 1142                | 0                     | ν(C-O)               | 1134                | 0                     | τ(OCH <sub>3</sub> ) |
| 1139                | 0                     | τ(OCH <sub>3</sub> ) | 1133                | 0                     | τ(OCH <sub>3</sub> ) |
| 1138                | 1                     | τ(OCH <sub>3</sub> ) | 1122                | 0                     | ν(C-O)               |
| 622                 | 0                     | ν(O-Li)              |                     |                       |                      |
| 591                 | 9                     | δ(LiOLi)             |                     |                       |                      |
| 549                 | 0                     | ν(O-Li)              |                     |                       |                      |
| 527                 | 0                     | δ(O-Li)              |                     |                       |                      |

Table S16. DFT/LDA vibrational frequencies for the crystalline structure of HCO<sub>2</sub>Na and its respective band assignments.

| HCO <sub>2</sub> Na |            |
|---------------------|------------|
| (cm <sup>-1</sup> ) | Assignment |
| 2830                | v(CH)      |
| 2829                | v(CH)      |
| 1577                | v(C=O)     |
| 1575                | v(C=O)     |
| 1353                | v(OCO)     |
| 1351                | v(OCO)     |
| 1319                | δ(HCO)     |
| 1315                | δ(HCO)     |
| 1026                | τ(CH)      |
| 1021                | τ(CH)      |
| 771                 | δ(OCO)     |
| 770                 | δ(OCO)     |

Table S17. DFT/B3PW91/Sadlej optimized atomic coordinates (in Å) for CH<sub>3</sub>OLi and CH<sub>3</sub>ONa molecular trimers.

| Atom | X        | Y        | Z        | Atom | X        | Y        | Z        |
|------|----------|----------|----------|------|----------|----------|----------|
| C    | -0.05093 | 3.86295  | -0.22896 | C    | 0.09782  | 4.21517  | -0.11332 |
| C    | -2.78590 | -1.13047 | -0.04104 | C    | 3.13872  | -1.29645 | 0.09550  |
| C    | 2.90749  | -0.99471 | 0.12749  | C    | -3.16090 | -1.17090 | -0.12141 |
| H    | -0.54287 | 4.24571  | -1.14790 | H    | -0.38396 | 4.65663  | -1.01763 |
| H    | -0.57496 | 4.33878  | 0.62662  | H    | -0.39798 | 4.70589  | 0.75732  |
| H    | 0.97265  | 4.29425  | -0.23318 | H    | 1.13796  | 4.61972  | -0.11666 |
| H    | 2.76905  | -2.09485 | 0.19331  | H    | 2.98531  | -2.40174 | 0.10277  |
| H    | -2.87652 | -1.83193 | -0.89704 | H    | -3.29191 | -1.84869 | -0.99789 |
| H    | -2.93374 | -1.73763 | 0.87682  | H    | -3.34981 | -1.80552 | 0.77655  |
| H    | 3.51152  | -0.71349 | 1.01581  | H    | 3.73905  | -1.08457 | 1.01183  |
| H    | 3.55665  | -0.82515 | -0.75730 | H    | 3.82784  | -1.10849 | -0.76158 |
| H    | -3.67004 | -0.46111 | -0.10508 | H    | -4.03045 | -0.47266 | -0.16700 |
| Li   | 0.08722  | -1.02089 | 0.04662  | NA   | 0.00578  | -1.42837 | -0.05186 |
| Li   | 1.37558  | 1.43401  | -0.05615 | NA   | -1.70692 | 1.59600  | -0.10750 |
| Li   | -1.39468 | 1.32103  | -0.13199 | NA   | 1.75101  | 1.55647  | 0.00336  |
| O    | -0.05490 | 2.47639  | -0.15632 | O    | 0.03700  | 2.83631  | -0.07553 |
| O    | -1.58155 | -0.43961 | -0.03900 | O    | -1.93646 | -0.53339 | -0.09702 |
| O    | 1.70728  | -0.30060 | 0.05319  | O    | 1.96506  | -0.57255 | 0.02714  |

Table S18. DFT/B3PW91/Sadlej optimized atomic coordinates (in Å) for CH<sub>3</sub>OLi and CH<sub>3</sub>ONa molecular tetramers.

| Atom | X        | Y        | Z        | Atom | X        | Y        | Z        |
|------|----------|----------|----------|------|----------|----------|----------|
| C    | 0.73961  | -0.80201 | 2.95312  | C    | 0.86247  | -0.63694 | 3.15075  |
| C    | -1.67122 | 2.65516  | 0.04496  | C    | -1.77670 | 2.96998  | -0.17496 |
| C    | -1.69616 | -2.27936 | -1.31401 | C    | -1.88113 | -2.49194 | -1.34612 |
| C    | 2.63153  | 0.43636  | -1.64517 | C    | 2.84386  | 0.41173  | -1.96696 |
| H    | 0.33432  | -1.79421 | 3.24272  | H    | 0.43394  | -1.59788 | 3.51940  |
| H    | 0.34812  | -0.08256 | 3.70264  | H    | 0.50534  | 0.13659  | 3.86997  |
| H    | -1.19204 | 3.48082  | -0.52184 | H    | -1.31748 | 3.76840  | -0.80304 |
| H    | -1.20735 | -2.70053 | -2.21759 | H    | -1.41634 | -2.99665 | -2.22494 |
| H    | 1.83459  | -0.85785 | 3.12772  | H    | -1.91445 | 3.43272  | 0.83004  |
| H    | -1.83998 | 3.04761  | 1.06973  | H    | 1.95956  | -0.71850 | 3.33124  |
| H    | -1.87443 | -3.13982 | -0.63538 | H    | -2.07839 | -3.30748 | -0.61194 |
| H    | -2.67967 | 2.52503  | -0.40105 | H    | -2.80757 | 2.83814  | -0.57876 |
| H    | -2.70029 | -1.93796 | -1.64235 | H    | -2.88780 | -2.16486 | -1.69604 |
| H    | 2.71263  | -0.24394 | -2.51874 | H    | 2.92223  | 1.41259  | -2.45224 |
| H    | 2.71617  | 1.46578  | -2.05239 | H    | 2.92833  | -0.32374 | -2.80053 |
| H    | 3.54995  | 0.27037  | -1.04384 | H    | 3.78525  | 0.29738  | -1.38066 |
| Li   | -0.34973 | 0.38926  | -1.39091 | NA   | -0.44623 | 0.44088  | -1.83775 |
| Li   | 0.79572  | -1.27036 | -0.00548 | NA   | 0.98626  | -1.51993 | -0.03268 |
| Li   | 0.81955  | 1.09347  | 0.63937  | NA   | 1.05360  | 1.44081  | 0.59268  |
| Li   | -1.25053 | -0.20396 | 0.80499  | NA   | -1.50852 | -0.12085 | 0.92744  |
| O    | 0.41964  | -0.44945 | 1.65093  | O    | 0.53896  | -0.35836 | 1.83688  |
| O    | -0.92279 | 1.48817  | 0.03237  | O    | -1.04254 | 1.80002  | -0.14651 |
| O    | -0.95228 | -1.27095 | -0.72085 | O    | -1.11531 | -1.46245 | -0.83392 |
| O    | 1.46850  | 0.23986  | -0.91640 | O    | 1.70023  | 0.25560  | -1.20833 |
